# Supplementary material
Source: Springer Nature journal article supplement (https://www.springermedizin.de/resource/supplementary/13012_2013_740_MOESM1_ESM.pdf/9630572)
Supplement: MOESM1 [file 9630572]

**Enrolment**

**General dentists**  
(n=58, including a drop-out rate of 20%)

**Data collection**

**Baseline data collection**  
(n=58.000 patients, including a drop-out rate of 20%)

**Randomisation**

**Cluster randomisation**  
of dental practices

Allocated to  
**intervention** (n≈29)

Allocated to **control**  
(n≈29)

**Intervention**

Participation in  
intervention seminar +  
prescribing feedback

Care as usual

**Data collection**

**T1 data collection**  
(n=46.000 patients)

**T2 data collection**  
(n=46.000 patients)
